# Supplementary material for: Clarifying the effects of nanoscale porosity of silicon on the bandgap and alignment: a combined molecular dynamics–density functional tight binding computational study
Source: Royal Society of Chemistry journal article supplement (doi:10.1039/d3cp00633f), 2023-01-01
Supplement: d3cp00633f1.pdf [file d3cp00633f1.pdf]

## Supplementary Information

### Clarifying effects of nanoscale porosity of silicon on the band gap and alignment: a combined molecular dynamics – density functional tight binding computational study

Panus Sundarapura, Sergei Manzhos, Manabu Ihara

Table S1: Computed band gap ( $E_g$ ), the valence band maximum (VBM) and conduction band minimum (CBM), of the spherical pore models, along with its corresponding four initial box sizes (S(mall), M(edium), L(arge), XL (extra large)), number of atoms, and pore parameters: diameter ( $d$ ), shortest ( $l$ ) and largest ( $L$ ) inter-pore distance.

| Model label | Box Size | Number of Atom |      |       | $d$  | $L$  | $l$  | Porosity | VBM   | CBM   | $E_g$ |
|-------------|----------|----------------|------|-------|------|------|------|----------|-------|-------|-------|
|             | [nm]     | Si             | H    | Total | [nm] | [nm] | [nm] | [%]      | [eV]  | [eV]  | [eV]  |
| S1          | 2.17     | 425            | 204  | 629   | 1.47 | 2.25 | 0.86 | 16.2     | -5.16 | -3.62 | 1.54  |
| S2          |          | 465            | 188  | 653   | 1.20 | 2.72 | 0.98 | 8.8      | -5.10 | -3.77 | 1.33  |
| S3          |          | 495            | 164  | 659   | 0.92 | 3.02 | 1.52 | 4.0      | -5.09 | -3.88 | 1.21  |
| M1          | 3.26     | 1263           | 540  | 1803  | 2.56 | 3.01 | 0.72 | 25.4     | -5.15 | -3.74 | 1.41  |
| M2          |          | 1537           | 436  | 1973  | 2.02 | 3.64 | 1.26 | 12.5     | -5.07 | -3.90 | 1.17  |
| M3          |          | 1681           | 348  | 2029  | 1.20 | 4.58 | 2.07 | 2.6      | -5.07 | -3.97 | 1.10  |
| L1          | 4.34     | 2997           | 948  | 3945  | 3.37 | 4.12 | 0.98 | 24.4     | -5.08 | -3.86 | 1.22  |
| L2          |          | 3631           | 764  | 4395  | 2.56 | 4.89 | 1.81 | 10.7     | -5.05 | -3.94 | 1.11  |
| L3          |          | 3949           | 612  | 4561  | 1.74 | 6.06 | 2.61 | 3.4      | -5.06 | -3.99 | 1.07  |
| XL1         | 4.89     | 4264           | 1200 | 5464  | 3.87 | 4.79 | 0.98 | 26.0     | -5.06 | -3.89 | 1.17  |
| XL2         |          | 5126           | 1000 | 6126  | 2.74 | 5.96 | 2.07 | 9.2      | -5.05 | -3.95 | 1.10  |
| XL3         |          | 5636           | 792  | 6428  | 2.03 | 7.15 | 2.88 | 3.8      | -5.06 | -4.00 | 1.06  |
| c-Si        |          | 144            | 8    | 152   | 0    | Bulk | Bulk | 0        | -5.03 | -3.96 | 1.07  |

Table S2. Computed band gap ( $E_g$ ) of the internal cube models, their valence band maximum (VBM) and conduction band minimum (CBM), along with its corresponding four initial box sizes (S, M, L, XL), number of atoms, and pore parameters.

| Model Name | Box Size | Number of Atom |      |       | $d$  | $L$  | $l$  | Porosity | VBM   | CBM   | $E_g$ |
|------------|----------|----------------|------|-------|------|------|------|----------|-------|-------|-------|
|            | [nm]     | Si             | H    | Total | [nm] | [nm] | [nm] | [%]      | [eV]  | [eV]  | [eV]  |
| S1         | 2.17     | 341            | 308  | 649   | 2.32 | 1.49 | 0.74 | 30.4     | -5.32 | -3.44 | 1.88  |
| S2         |          | 417            | 252  | 669   | 1.99 | 1.77 | 1.00 | 16.0     | -5.21 | -3.63 | 1.58  |
| S3         |          | 495            | 164  | 659   | 0.90 | 3.05 | 1.54 | 2.6      | -5.09 | -3.88 | 1.21  |
| M1         | 3.26     | 863            | 828  | 1691  | 4.18 | 1.49 | 0.74 | 47.4     | -5.33 | -3.44 | 1.89  |
| M2         |          | 1107           | 734  | 1831  | 3.87 | 1.77 | 1.00 | 33.8     | -5.23 | -3.58 | 1.65  |
| M3         |          | 1449           | 540  | 1989  | 2.65 | 3.05 | 1.54 | 14.7     | -5.12 | -3.83 | 1.29  |
| M4         |          | 1683           | 364  | 2047  | 1.39 | 4.27 | 2.36 | 2.4      | -5.07 | -3.98 | 1.09  |
| L1         | 4.34     | 1625           | 1604 | 3229  | 6.07 | 1.49 | 0.74 | 58.3     | -5.34 | -3.44 | 1.90  |
| L2         |          | 2133           | 1452 | 3585  | 5.75 | 1.77 | 1.00 | 45.8     | -5.20 | -3.58 | 1.62  |
| L3         |          | 2931           | 1172 | 4103  | 4.52 | 3.05 | 1.54 | 27.1     | -5.08 | -3.79 | 1.29  |
| L4         |          | 3669           | 852  | 4521  | 3.77 | 4.27 | 2.36 | 10.4     | -5.06 | -3.94 | 1.12  |
| L5         |          | 4001           | 636  | 4637  | 2.01 | 5.52 | 3.15 | 2.1      | -5.07 | -3.99 | 1.08  |
| L6         |          | 4091           | 524  | 4615  | 0.48 | 7.09 | 3.97 | 0.1      | -5.07 | -4.01 | 1.06  |
| XL1        | 4.89     | 2096           | 2088 | 4184  | 7.01 | 1.49 | 0.74 | 62.6     | -5.33 | -3.45 | 1.88  |
| XL2        |          | 2772           | 1912 | 4684  | 6.69 | 1.77 | 1.00 | 50.4     | -5.19 | -3.58 | 1.61  |
| XL3        |          | 3870           | 1584 | 5454  | 5.46 | 3.05 | 1.54 | 32.2     | -5.07 | -3.78 | 1.29  |
| XL4        |          | 4968           | 1192 | 6160  | 4.21 | 4.27 | 2.36 | 14.4     | -5.05 | -3.93 | 1.12  |
| XL5        |          | 5552           | 904  | 6456  | 2.95 | 5.52 | 3.15 | 4.5      | -5.06 | -3.98 | 1.08  |
| XL6        |          | 5786           | 720  | 6506  | 1.39 | 7.09 | 3.97 | 0.8      | -5.07 | -4.02 | 1.05  |
| c-Si       | -        | 144            | 8    | 152   | 0    | Bulk | Bulk | 0        | -5.03 | -3.96 | 1.07  |

Table S3. Computed band gap ( $E_g$ ) of the pillar models, calculated by its valence band maximum (VBM) and conduction band minimum (CBM) along with its corresponding number of atoms, and pore features. The band gaps of the pillar and base part are calculated separately to investigate the effect of the local band gap. Four key features are varied to investigate the effect of each part: pillar diameter, pillar height, base layer, and interpillar distance with different pillar diameters. The varied features in each set are highlighted in bold.

| Model Name           |   | Number of Atom |      |       | Height    | Base     | Pillar Diameter | Distance    |         | Porosity | VBM/CBM       |               | $E_g$ |      |
|----------------------|---|----------------|------|-------|-----------|----------|-----------------|-------------|---------|----------|---------------|---------------|-------|------|
|                      |   |                |      |       |           |          |                 | Shortest    | Largest |          | Wall          | Base          | Wall  | Base |
|                      |   | Si             | H    | Total | [nm]      | [nm]     | [nm]            | [nm]        | [nm]    | [%]      | [eV]          | [eV]          | [eV]  | [eV] |
| Pillar Diameter      | 1 | 1184           | 624  | 1808  | 7         | 1        | <b>1</b>        | 2.17        | 3.46    | 93       | -5.90 / -3.27 | -5.22 / -3.63 | 2.63  | 1.59 |
|                      | 2 | 1834           | 824  | 2658  | 7         | 1        | <b>2</b>        | 1.38        | 2.69    | 70       | -5.54 / -3.64 | -5.24 / -3.88 | 1.90  | 1.36 |
|                      | 3 | 3136           | 1016 | 4152  | 7         | 1        | <b>3</b>        | 0.38        | 1.92    | 33       | -5.26 / -3.73 | -5.19 / -3.79 | 1.23  | 1.23 |
| Pillar Height        | 1 | 237            | 100  | 337   | <b>1</b>  | 1        | 1               | 0.54        | 1.15    | 70       | -5.50 / -2.91 | -5.02 / -3.57 | 2.59  | 1.45 |
|                      | 2 | 866            | 576  | 1442  | <b>10</b> | 1        | 1               | 0.54        | 1.15    | 70       | -5.61 / -3.06 | -5.08 / -3.72 | 2.55  | 1.36 |
|                      | 3 | 1532           | 1080 | 2612  | <b>20</b> | 1        | 1               | 0.54        | 1.15    | 70       | -5.59 / -3.03 | -5.09 / -3.75 | 2.56  | 1.34 |
|                      | 4 | 2235           | 1612 | 3847  | <b>30</b> | 1        | 1               | 0.54        | 1.15    | 70       | -5.53 / -3.00 | -5.08 / -3.76 | 2.53  | 1.32 |
|                      | 5 | 2901           | 2116 | 5017  | <b>40</b> | 1        | 1               | 0.54        | 1.15    | 70       | -5.55 / -3.04 | -5.09 / -3.77 | 2.51  | 1.32 |
|                      | 6 | 3567           | 2620 | 6187  | <b>50</b> | 1        | 1               | 0.54        | 1.15    | 70       | -5.51 / -2.97 | -5.08 / -3.76 | 2.54  | 1.32 |
| Base Layer           | 1 | 1184           | 624  | 1808  | 7         | <b>1</b> | 1               | 2.17        | 3.46    | 93       | -5.90 / -3.27 | -5.22 / -3.63 | 2.63  | 1.59 |
|                      | 2 | 1569           | 652  | 2221  | 7         | <b>2</b> | 1               | 2.17        | 3.46    | 93       | -5.70 / -3.18 | -4.95 / -3.58 | 2.52  | 1.37 |
|                      | 3 | 2145           | 652  | 2797  | 7         | <b>3</b> | 1               | 2.17        | 3.46    | 93       | -5.56 / -3.16 | -4.80 / -3.62 | 2.40  | 1.18 |
| Interpillar Distance | 1 | 468            | 400  | 868   | 10        | 1        | 1               | <b>0.38</b> | 0.77    | 33       | -5.70 / -3.20 | -5.22 / -3.94 | 2.50  | 1.28 |
|                      | 2 | 866            | 576  | 1442  | 10        | 1        | 1               | <b>0.54</b> | 1.15    | 70       | -5.61 / -3.06 | -5.08 / -3.73 | 2.55  | 1.35 |

|                                |   |      |      |      |    |   |     |             |      |    |               |               |      |      |
|--------------------------------|---|------|------|------|----|---|-----|-------------|------|----|---------------|---------------|------|------|
| Pillar<br>diameter<br>= 1 nm   | 3 | 1006 | 632  | 1638 | 10 | 1 | 1   | <b>1.09</b> | 1.92 | 83 | -5.68 / -3.13 | -5.07 / -3.73 | 2.55 | 1.34 |
|                                | 4 | 1186 | 704  | 1890 | 10 | 1 | 1   | <b>1.63</b> | 2.69 | 89 | -5.77 / -3.26 | -5.04 / -3.72 | 2.51 | 1.32 |
|                                | 5 | 1406 | 792  | 2198 | 10 | 1 | 1   | <b>2.17</b> | 3.46 | 93 | -5.82 / -3.29 | -5.00 / -3.67 | 2.53 | 1.33 |
|                                | 6 | 1666 | 896  | 2562 | 10 | 1 | 1   | <b>2.71</b> | 4.22 | 95 | -5.82 / -3.39 | -4.97 / -3.64 | 2.43 | 1.33 |
|                                | 7 | 1966 | 1016 | 2982 | 10 | 1 | 1   | <b>3.26</b> | 4.99 | 96 | -5.81 / -3.43 | -4.94 / -3.60 | 2.38 | 1.34 |
| Pillar<br>diameter<br>= 1.5 nm | 1 | 999  | 604  | 1603 | 10 | 1 | 1.5 | <b>0.38</b> | 1.15 | 33 | -5.43 / -3.28 | -5.19 / -3.71 | 2.15 | 1.48 |
|                                | 2 | 1111 | 660  | 1771 | 10 | 1 | 1.5 | <b>0.86</b> | 1.92 | 63 | -5.43 / -3.23 | -4.99 / -3.65 | 2.20 | 1.34 |
|                                | 3 | 1255 | 732  | 1987 | 10 | 1 | 1.5 | <b>1.38</b> | 2.69 | 76 | -5.52 / -3.34 | -5.06 / -3.62 | 2.18 | 1.44 |
|                                | 4 | 1431 | 820  | 2251 | 10 | 1 | 1.5 | <b>1.92</b> | 3.46 | 83 | -5.49 / -3.42 | -5.03 / -3.59 | 2.07 | 1.44 |
|                                | 5 | 1639 | 924  | 2563 | 10 | 1 | 1.5 | <b>2.46</b> | 4.22 | 88 | -5.53 / -3.48 | -4.99 / -3.56 | 2.05 | 1.43 |
|                                | 6 | 1879 | 1044 | 2923 | 10 | 1 | 1.5 | <b>2.99</b> | 4.99 | 91 | -5.55 / -3.51 | -4.96 / -3.52 | 2.04 | 1.44 |
|                                | 7 | 2151 | 1180 | 3331 | 10 | 1 | 1.5 | <b>3.54</b> | 5.76 | 93 | -5.60 / -3.54 | -4.92 / -3.48 | 2.06 | 1.44 |
|                                | 8 | 2455 | 1332 | 3787 | 10 | 1 | 1.5 | <b>4.08</b> | 6.53 | 94 | -5.61 / -3.58 | -4.90 / -3.45 | 2.03 | 1.45 |
| Pillar<br>diameter<br>= 2 nm   | 1 | 1947 | 956  | 2903 | 10 | 1 | 2   | <b>0.38</b> | 1.15 | 33 | -5.16 / -3.44 | -5.13 / -3.65 | 1.75 | 1.48 |
|                                | 2 | 2091 | 1028 | 3119 | 10 | 1 | 2   | <b>0.86</b> | 1.92 | 57 | -5.21 / -3.42 | -5.09 / -3.63 | 1.79 | 1.46 |
|                                | 3 | 2267 | 1116 | 3383 | 10 | 1 | 2   | <b>1.38</b> | 2.69 | 70 | -5.25 / -3.47 | -5.06 / -3.62 | 1.78 | 1.44 |
|                                | 4 | 2475 | 1220 | 3695 | 10 | 1 | 2   | <b>1.92</b> | 3.46 | 78 | -5.34 / -3.52 | -5.03 / -3.60 | 1.82 | 1.43 |
|                                | 5 | 2715 | 1340 | 4055 | 10 | 1 | 2   | <b>2.46</b> | 4.22 | 83 | -5.37 / -3.55 | -5.00 / -3.56 | 1.82 | 1.44 |
|                                | 6 | 2987 | 1476 | 4463 | 10 | 1 | 2   | <b>2.99</b> | 4.99 | 87 | -5.38 / -3.59 | -4.97 / -3.54 | 1.79 | 1.43 |
|                                | 7 | 3291 | 1628 | 4919 | 10 | 1 | 2   | <b>3.54</b> | 5.76 | 89 | -5.42 / -3.62 | -4.95 / -3.51 | 1.80 | 1.44 |
| c-Si                           | - | 144  | 8    | 152  | -  | - | -   | Bulk        | Bulk | 0  | -             | -5.03 / -3.96 | 1.07 |      |

Table S4: Computed band gap ( $E_g$ ) of the craters models, calculated by its valence band maximum (VBM) and conduction band minimum (CBM) (not shown in the table), along with its corresponding number of atoms, and pore features. The band gaps of the crater are divided into the wall and base parts, which are calculated separately to investigate the effect of the local band gap. Three key features are varied to investigate the effect of each part: crater depth crater wall thickness, and crater diameter.

| Model Name            |   | Number of Atom |      |       | Depth     | Base | Crater Diameter | Thickest Wall | Thinnest Wall | Porosity | VBM/CBM       |               | $E_g$ |      |
|-----------------------|---|----------------|------|-------|-----------|------|-----------------|---------------|---------------|----------|---------------|---------------|-------|------|
|                       |   |                |      |       |           |      |                 |               |               |          | Wall          | Base          | Wall  | Base |
|                       |   | Si             | H    | Total | [nm]      | [nm] | [nm]            | [nm]          | [nm]          | [%]      | [eV]          | [eV]          | [eV]  | [eV] |
| Crater Depth          | 1 | 1823           | 576  | 2399  | <b>4</b>  | 1    | 2.4             | 1.92          | 0.86          | 34       | -5.20 / -3.60 | -5.08 / -3.69 | 1.63  | 1.45 |
|                       | 2 | 2491           | 784  | 3275  | <b>6</b>  | 1    | 2.4             | 1.92          | 0.86          | 37       | -5.18 / -3.57 | -5.06 / -3.63 | 1.61  | 1.43 |
|                       | 3 | 3827           | 1200 | 5027  | <b>10</b> | 1    | 2.4             | 1.92          | 0.86          | 39       | -5.18 / -3.55 | -5.03 / -3.58 | 1.60  | 1.39 |
| Crater Wall Thickness | 1 | 1823           | 576  | 2399  | 4         | 1    | 2.4             | <b>1.92</b>   | 0.86          | 34       | -5.20 / -3.60 | -5.08 / -3.69 | 1.60  | 1.39 |
|                       | 2 | 2759           | 680  | 3439  | 4         | 1    | 2.4             | <b>2.69</b>   | 1.38          | 25       | -5.04 / -3.77 | -5.04 / -3.77 | 1.27  | 1.27 |
|                       | 3 | 3839           | 800  | 4639  | 4         | 1    | 2.4             | <b>3.46</b>   | 1.92          | 19       | -5.00 / -3.82 | -5.00 / -3.82 | 1.18  | 1.18 |
| Crater Diameter       | 1 | 895            | 348  | 1243  | 4         | 1    | 4               | <b>0.38</b>   | 0             | 79       | -6.85 / -2.38 | -5.03 / -3.61 | 4.47  | 1.42 |
|                       | 2 | 989            | 392  | 1381  | 4         | 1    | 3.8             | <b>0.77</b>   | 0             | 73       | -6.41 / -3.21 | -5.05 / -3.62 | 2.93  | 1.43 |
|                       | 3 | 1087           | 476  | 1563  | 4         | 1    | 3.5             | <b>0.96</b>   | 0             | 64       | -5.89 / -3.17 | -5.07 / -3.55 | 2.72  | 1.52 |
|                       | 4 | 1137           | 444  | 1581  | 4         | 1    | 3.45            | <b>1.15</b>   | 0             | 63       | -5.69 / -3.49 | -5.09 / -3.62 | 2.20  | 1.47 |
|                       | 5 | 1259           | 644  | 1903  | 4         | 1    | 3.2             | <b>1.15</b>   | 0.12          | 56       | -5.67 / -3.43 | -5.10 / -3.58 | 2.24  | 1.52 |
|                       | 6 | 1525           | 608  | 2133  | 4         | 1    | 2.8             | <b>1.54</b>   | 0.38          | 44       | -5.31 / -3.55 | -5.08 / -3.66 | 1.76  | 1.42 |
|                       | 7 | 1823           | 576  | 2399  | 4         | 1    | 2.4             | <b>1.92</b>   | 0.86          | 34       | -5.20 / -3.60 | -5.08 / -3.69 | 1.60  | 1.39 |
| c-Si                  | - | 144            | 8    | 152   | 0         | 0    | 0               | Bulk          | Bulk          | 0        | -             | -5.03 / -3.96 | 1.07  |      |
